# Supplementary material for: EARTHQUAKE ENGINEERING RESEARCH NEEDS IN INTRA-PLATE SEISMIC REGIONS
Source: MDPI journal article supplement (doi:10.3390/ani14020232), 1996-10-01
Supplement: s1 [file s1]

**Supplementary Materials.** An overview of the prevalence and detection levels of metals in European hedgehogs. Abbreviations used: Belgium (BE), the Netherlands (NL), Finland (FI), Portugal (PT), Italy (I), not detected (ND), not applicable (na), inductively coupled plasma-mass spectrometry (ICP-MS), inductively coupled plasma-optical emission spectrometer (ICP-OES), atomic absorption spectrometry (AAS). \* Denotes measures based on a range of means from seven study sites.

| Reference             | Compound | Method  | Sample material | Sample size | Sampling year | Country | Levels detected (µg/g dry weight) | Levels detected (µg/mL wet weight) | Mean levels detected (µg/g) | Frequency of positives % | Hedgehogs analysed          |
|-----------------------|----------|---------|-----------------|-------------|---------------|---------|-----------------------------------|------------------------------------|-----------------------------|--------------------------|-----------------------------|
| <b>Ag</b>             |          |         |                 |             |               |         |                                   |                                    |                             |                          |                             |
| D'Havé et al. 2006b   | Ag       | ICP-MS  | Fat             | 7           | 2002-2003     | BE+NL   | ND-0.005                          | na                                 | 0.002                       | na                       | Dead, road-killed + in care |
| D'Havé et al. 2006b   | Ag       | ICP-MS  | Hair            | 43          | 2002-2003     | BE+NL   | ND-0.19                           | na                                 | 0.02                        | 72                       | Dead, road-killed + in care |
| D'Havé et al. 2005a   | Ag       | ICP-OES | Hair            | 83          | 2002          | BE      | 0.004-0.317*                      | na                                 | na                          | na                       | Live, wild hedgehogs        |
| D'Havé et al. 2006b   | Ag       | ICP-MS  | Kidney          | 44          | 2002-2003     | BE+NL   | ND-0.62                           | na                                 | 0.04                        | na                       | Dead, road-killed + in care |
| D'Havé et al. 2006b   | Ag       | ICP-MS  | Liver           | 43          | 2002-2003     | BE+NL   | ND-0.48                           | na                                 | 0.12                        | na                       | Dead, road-killed + in care |
| D'Havé et al. 2006b   | Ag       | ICP-MS  | Muscle          | 44          | 2002-2003     | BE+NL   | ND-0.057                          | na                                 | ND                          | na                       | Dead, road-killed + in care |
| D'Havé et al. 2006b   | Ag       | ICP-MS  | Spines          | 43          | 2002-2003     | BE+NL   | ND-0.35                           | na                                 | 0.02                        | 81                       | Dead, road-killed + in care |
| D'Havé et al. 2005a   | Ag       | ICP-OES | Spines          | 82          | 2002          | BE      | 0.008-0.255*                      | na                                 | na                          | na                       | Live, wild hedgehogs        |
| <b>Al</b>             |          |         |                 |             |               |         |                                   |                                    |                             |                          |                             |
| Vermeulen et al. 2009 | Al       | ICP-MS  | Blood           | 26          | 2005-2006     | BE      | na                                | 0.5-17.7                           | na                          | 100                      | Live, wild hedgehogs        |
| D'Havé et al. 2006b   | Al       | ICP-MS  | Fat             | 7           | 2002-2003     | BE+NL   | ND-47                             | na                                 | 8                           | na                       | Dead, road-killed + in care |
| D'Havé et al. 2006b   | Al       | ICP-MS  | Hair            | 43          | 2002-2003     | BE+NL   | 1-331                             | na                                 | 42                          | na                       | Dead, road-killed + in care |
| Vermeulen et al. 2009 | Al       | ICP-MS  | Hair            | 26          | 2005-2006     | BE      | 1-6                               | na                                 | na                          | 100                      | Live, wild hedgehogs        |
| D'Havé et al. 2005a   | Al       | ICP-OES | Hair            | 83          | 2002          | BE      | 1.52-17.12*                       | na                                 | na                          | na                       | Live, wild hedgehogs        |
| D'Havé et al. 2006b   | Al       | ICP-MS  | Kidney          | 44          | 2002-2003     | BE+NL   | ND-63                             | na                                 | 15                          | na                       | Dead, road-killed + in care |
| D'Havé et al. 2006b   | Al       | ICP-MS  | Liver           | 43          | 2002-2003     | BE+NL   | 1-106                             | na                                 | 11                          | na                       | Dead, road-killed + in care |
| D'Havé et al. 2006b   | Al       | ICP-MS  | Muscle          | 44          | 2002-2003     | BE+NL   | ND-129                            | na                                 | 18                          | na                       | Dead, road-killed + in care |

|                           |    |         |        |         |           |       |              |         |       |     |                                |
|---------------------------|----|---------|--------|---------|-----------|-------|--------------|---------|-------|-----|--------------------------------|
| D'Havé et al. 2006b       | Al | ICP-MS  | Spines | 43      | 2002-2003 | BE+NL | 14-230       | na      | 76    | na  | Dead, road-killed + in care    |
| Vermeulen et al. 2009     | Al | ICP-MS  | Spines | 26      | 2005-2006 | BE    | 4-39         | na      | na    | 100 | Live, wild hedgehogs           |
| D'Havé et al. 2005a       | Al | ICP-OES | Spines | 82      | 2002      | BE    | 10.55-62.93* | na      | na    | na  | Live, wild hedgehogs           |
| <b>Cd</b>                 |    |         |        |         |           |       |              |         |       |     |                                |
| Vermeulen et al. 2009     | Cd | ICP-MS  | Blood  | 26      | 2005-2006 | BE    | na           | ND-0.42 | na    | 50  | Live, wild hedgehogs           |
| D'Havé et al. 2006b       | Cd | ICP-MS  | Fat    | 7       | 2002-2003 | BE+NL | 0.01-36      | na      | 0.1   | na  | Dead, road-killed + in care    |
| Rautio et al. 2010        | Cd | ICP-OES | Hair   | 65      | 2004-2005 | FI    | ND-0.16      | na      | 0.04  | 100 | Dead, road-killed + starvation |
| D'Havé et al. 2006b       | Cd | ICP-MS  | Hair   | 43      | 2002-2003 | BE+NL | ND-23        | na      | 0.83  | 70  | Dead, road-killed + in care    |
| Vermeulen et al. 2009     | Cd | ICP-MS  | Hair   | 26      | 2005-2006 | BE    | ND-1.3       | na      | na    | 50  | Live, wild hedgehogs           |
| D'Havé et al. 2005a       | Cd | ICP-OES | Hair   | 83      | 2002      | BE    | 0.01-1.08*   | na      | na    | na  | Live, wild hedgehogs           |
| Rautio et al. 2010        | Cd | ICP-OES | Kidney | 64      | 2004-2005 | FI    | 0.71–21.35   | na      | 5.74  | 100 | Dead, road-killed + starvation |
| D'Havé et al. 2006b       | Cd | ICP-MS  | Kidney | 44      | 2002-2003 | BE+NL | 0.3-337      | na      | 45.17 | na  | Dead, road-killed + in care    |
| Rautio et al. 2010        | Cd | ICP-OES | Liver  | 58      | 2004-2005 | FI    | 0.26–7.68    | na      | 1.81  | 100 | Dead, road-killed + starvation |
| D'Havé et al. 2006b       | Cd | ICP-MS  | Liver  | 43      | 2002-2003 | BE+NL | 0.1-124      | na      | 13.39 | na  | Dead, road-killed + in care    |
| Jota Baptista et al. 2023 | Cd | ICP-MS  | Liver  | 41      | 2019-2021 | PT    | ND-6.07      | na      | 0.84  | na  | Dead, in care                  |
| Alleva et al. 2006        | Cd | AAS     | Liver  | unknown | 1994-1995 | I     | 0.07-0.65    | na      | 0.34  | na  | Dead, road-killed              |
| D'Havé et al. 2006b       | Cd | ICP-MS  | Muscle | 44      | 2002-2003 | BE+NL | ND-10        | na      | 0.64  | na  | Dead, road-killed + in care    |
| Rautio et al. 2010        | Cd | ICP-OES | Spines | 63      | 2004-2005 | FI    | ND-0.08      | na      | 0.04  | 98  | Dead, road-killed + starvation |
| D'Havé et al. 2006b       | Cd | ICP-MS  | Spines | 43      | 2002-2003 | BE+NL | ND-0.9       | na      | 0.12  | 93  | Dead, road-killed + in care    |
| Vermeulen et al. 2009     | Cd | ICP-MS  | Spines | 26      | 2005-2006 | BE    | ND-1.54      | na      | na    | 50  | Live, wild hedgehogs           |
| D'Havé et al. 2005a       | Cd | ICP-OES | Spines | 82      | 2002      | BE    | 0.014-0.504* | na      | na    | na  | Live, wild hedgehogs           |
| <b>Co</b>                 |    |         |        |         |           |       |              |         |       |     |                                |

|                           |    |         |        |         |           |       |              |         |      |     |                             |
|---------------------------|----|---------|--------|---------|-----------|-------|--------------|---------|------|-----|-----------------------------|
| D'Havé et al. 2006b       | Co | ICP-MS  | Fat    | 7       | 2002-2003 | BE+NL | ND-0.057     | na      | 0.01 | 100 | Dead, road-killed + in care |
| D'Havé et al. 2006b       | Co | ICP-MS  | Hair   | 43      | 2002-2003 | BE+NL | ND-0.34      | na      | 0.09 | 98  | Dead, road-killed + in care |
| D'Havé et al. 2005a       | Co | ICP-OES | Hair   | 83      | 2002      | BE    | 0.014-0.055* | na      | na   | na  | Live, wild hedgehogs        |
| D'Havé et al. 2006b       | Co | ICP-MS  | Kidney | 44      | 2002-2003 | BE+NL | 0.05-13.66   | na      | 0.99 | 100 | Dead, road-killed + in care |
| Jota Baptista et al. 2023 | Co | ICP-MS  | Liver  | 41      | 2019-2021 | PT    | 0.05-1.66    | na      | 0.27 | na  | Dead, in care               |
| D'Havé et al. 2006b       | Co | ICP-MS  | Liver  | 43      | 2002-2003 | BE+NL | 0.06-1.2     | na      | 0.4  | 100 | Dead, road-killed + in care |
| D'Havé et al. 2006b       | Co | ICP-MS  | Muscle | 44      | 2002-2003 | BE+NL | 0.03-0.49    | na      | 0.18 | 100 | Dead, road-killed + in care |
| D'Havé et al. 2006b       | Co | ICP-MS  | Spines | 43      | 2002-2003 | BE+NL | ND-0.79      | na      | 0.13 | 100 | Dead, road-killed + in care |
| D'Havé et al. 2005a       | Co | ICP-OES | Spines | 82      | 2002      | BE    | 0.020-0.058* | na      | na   | na  | Live, wild hedgehogs        |
| <b>Cr</b>                 |    |         |        |         |           |       |              |         |      |     |                             |
| Vermeulen et al. 2009     | Cr | ICP-MS  | Blood  | 26      | 2005-2006 | BE    | na           | 1.6-5.3 | na   | 100 | Live, wild hedgehogs        |
| D'Havé et al. 2006b       | Cr | ICP-MS  | Fat    | 7       | 2002-2003 | BE+NL | 0.3-1.5      | na      | 0.8  | 100 | Dead, road-killed + in care |
| D'Havé et al. 2006b       | Cr | ICP-MS  | Hair   | 43      | 2002-2003 | BE+NL | 1-30.9       | na      | 5.4  | 100 | Dead, road-killed + in care |
| Vermeulen et al. 2009     | Cr | ICP-MS  | Hair   | 26      | 2005-2006 | BE    | 1.0-4.2      | na      | na   | 100 | Live, wild hedgehogs        |
| D'Havé et al. 2005a       | Cr | ICP-OES | Hair   | 83      | 2002      | BE    | 1.1-2.14*    | na      | na   | na  | Live, wild hedgehogs        |
| D'Havé et al. 2006b       | Cr | ICP-MS  | Kidney | 44      | 2002-2003 | BE+NL | 0.3-7.4      | na      | 3.4  | 100 | Dead, road-killed + in care |
| D'Havé et al. 2006b       | Cr | ICP-MS  | Liver  | 43      | 2002-2003 | BE+NL | 1.1-5.7      | na      | 3.9  | 100 | Dead, road-killed + in care |
| Jota Baptista et al. 2023 | Cr | ICP-MS  | Liver  | 41      | 2019-2021 | PT    | 0.02-0.7     | na      | 0.12 | na  | Dead, in care               |
| Alleva et al. 2006        | Cr | AAS     | Liver  | unknown | 1994-1995 | I     | ND           | na      | ND   | na  | Dead, road-killed           |
| D'Havé et al. 2006b       | Cr | ICP-MS  | Muscle | 44      | 2002-2003 | BE+NL | 1.6-8.4      | na      | 4.6  | 100 | Dead, road-killed + in care |
| D'Havé et al. 2006b       | Cr | ICP-MS  | Spines | 43      | 2002-2003 | BE+NL | 0.8-9.4      | na      | 4.3  | 100 | Dead, road-killed + in care |

|                           |           |         |               |    |           |       |                     |          |              |     |                                |
|---------------------------|-----------|---------|---------------|----|-----------|-------|---------------------|----------|--------------|-----|--------------------------------|
| Vermeulen et al. 2009     | <b>Cr</b> | ICP-MS  | <b>Spines</b> | 26 | 2005-2006 | BE    | <b>1.1-3.5</b>      | na       | <b>na</b>    | 100 | Live, wild hedgehogs           |
| D'Havé et al. 2005a       | <b>Cr</b> | ICP-OES | <b>Spines</b> | 82 | 2002      | BE    | <b>0.93-2.44*</b>   | na       | <b>na</b>    | na  | Live, wild hedgehogs           |
| <b>Cu</b>                 |           |         |               |    |           |       |                     |          |              |     |                                |
| Vermeulen et al. 2009     | <b>Cu</b> | ICP-MS  | <b>Blood</b>  | 26 | 2005-2006 | BE    | <b>na</b>           | 2.5-14.4 | <b>na</b>    | 100 | Live, wild hedgehogs           |
| D'Havé et al. 2006b       | <b>Cu</b> | ICP-MS  | <b>Fat</b>    | 7  | 2002-2003 | BE+NL | <b>0.2-5.6</b>      | na       | <b>1.8</b>   | 100 | Dead, road-killed + in care    |
| Rautio et al. 2010        | <b>Cu</b> | ICP-OES | <b>Hair</b>   | 65 | 2004-2005 | FI    | <b>13.39–55.98</b>  | na       | <b>24.38</b> | 78  | Dead, road-killed + starvation |
| D'Havé et al. 2006b       | <b>Cu</b> | ICP-MS  | <b>Hair</b>   | 43 | 2002-2003 | BE+NL | <b>8-146</b>        | na       | <b>62</b>    | 100 | Dead, road-killed + in care    |
| Vermeulen et al. 2009     | <b>Cu</b> | ICP-MS  | <b>Hair</b>   | 26 | 2005-2006 | BE    | <b>15-33</b>        | na       | <b>na</b>    | 100 | Live, wild hedgehogs           |
| D'Havé et al. 2005a       | <b>Cu</b> | ICP-OES | <b>Hair</b>   | 83 | 2002      | BE    | <b>17.17-23.27*</b> | na       | <b>na</b>    | na  | Live, wild hedgehogs           |
| Rautio et al. 2010        | <b>Cu</b> | ICP-OES | <b>Kidney</b> | 64 | 2004-2005 | FI    | <b>8.84–38.07</b>   | na       | <b>17.17</b> | 100 | Dead, road-killed + starvation |
| D'Havé et al. 2006b       | <b>Cu</b> | ICP-MS  | <b>Kidney</b> | 44 | 2002-2003 | BE+NL | <b>3-85</b>         | na       | <b>39</b>    | 100 | Dead, road-killed + in care    |
| Rautio et al. 2010        | <b>Cu</b> | ICP-OES | <b>Liver</b>  | 58 | 2004-2005 | FI    | <b>9.80–48.65</b>   | na       | <b>18.53</b> | 100 | Dead, road-killed + starvation |
| Jota Baptista et al. 2023 | <b>Cu</b> | ICP-MS  | <b>Liver</b>  | 41 | 2019-2021 | PT    | <b>12.11-102.91</b> | na       | <b>35.66</b> | na  | Dead, in care                  |
| D'Havé et al. 2006b       | <b>Cu</b> | ICP-MS  | <b>Liver</b>  | 43 | 2002-2003 | BE+NL | <b>3-200</b>        | na       | <b>64</b>    | 100 | Dead, road-killed + in care    |
| D'Havé et al. 2006b       | <b>Cu</b> | ICP-MS  | <b>Muscle</b> | 44 | 2002-2003 | BE+NL | <b>2-40</b>         | na       | <b>22</b>    | 100 | Dead, road-killed + in care    |
| Rautio et al. 2010        | <b>Cu</b> | ICP-OES | <b>Spines</b> | 63 | 2004-2005 | FI    | <b>7.58–33.78</b>   | na       | <b>11.13</b> | 100 | Dead, road-killed + starvation |
| D'Havé et al. 2006b       | <b>Cu</b> | ICP-MS  | <b>Spines</b> | 43 | 2002-2003 | BE+NL | <b>4-49</b>         | na       | <b>21</b>    | 100 | Dead, road-killed + in care    |
| Vermeulen et al. 2009     | <b>Cu</b> | ICP-MS  | <b>Spines</b> | 26 | 2005-2006 | BE    | <b>7.1-17.9</b>     | na       | <b>na</b>    | 100 | Live, wild hedgehogs           |
| D'Havé et al. 2005a       | <b>Cu</b> | ICP-OES | <b>Spines</b> | 82 | 2002      | BE    | <b>8.4-14.77*</b>   | na       | <b>na</b>    | na  | Live, wild hedgehogs           |
| <b>Fe</b>                 |           |         |               |    |           |       |                     |          |              |     |                                |
| Vermeulen et al. 2009     | <b>Fe</b> | ICP-MS  | <b>Blood</b>  | 26 | 2005-2006 | BE    | <b>na</b>           | 761-2228 | <b>na</b>    | 100 | Live, wild hedgehogs           |
| D'Havé et al. 2006b       | <b>Fe</b> | ICP-MS  | <b>Fat</b>    | 7  | 2002-2003 | BE+NL | <b>8-240</b>        | na       | <b>81</b>    | 100 | Dead, road-killed + in care    |

|                       |    |         |        |         |           |       |                |           |         |     |                                |
|-----------------------|----|---------|--------|---------|-----------|-------|----------------|-----------|---------|-----|--------------------------------|
| Rautio et al. 2010    | Fe | ICP-OES | Hair   | 65      | 2004-2005 | FI    | ND-827.46      | na        | 25.3    | 89  | Dead, road-killed + starvation |
| D'Havé et al. 2006b   | Fe | ICP-MS  | Hair   | 43      | 2002-2003 | BE+NL | 16-749         | na        | 104     | 100 | Dead, road-killed + in care    |
| Vermeulen et al. 2009 | Fe | ICP-MS  | Hair   | 26      | 2005-2006 | BE    | ND-22          | na        | na      | 100 | Live, wild hedgehogs           |
| D'Havé et al. 2005a   | Fe | ICP-OES | Hair   | 83      | 2002      | BE    | 8.18-35.79*    | na        | na      | na  | Live, wild hedgehogs           |
| Rautio et al. 2010    | Fe | ICP-OES | Kidney | 64      | 2004-2005 | FI    | 126.96–768.57  | na        | 294.43  | 100 | Dead, road-killed + starvation |
| D'Havé et al. 2006b   | Fe | ICP-MS  | Kidney | 44      | 2002-2003 | BE+NL | 54-2336        | na        | 879     | 100 | Dead, road-killed + in care    |
| Rautio et al. 2010    | Fe | ICP-OES | Liver  | 58      | 2004-2005 | FI    | 361.77–2849.76 | na        | 1023.69 | 100 | Dead, road-killed + starvation |
| D'Havé et al. 2006b   | Fe | ICP-MS  | Liver  | 43      | 2002-2003 | BE+NL | 199-7511       | na        | 2339    | 100 | Dead, road-killed + in care    |
| D'Havé et al. 2006b   | Fe | ICP-MS  | Muscle | 44      | 2002-2003 | BE+NL | 90-2393        | na        | 669     | 100 | Dead, road-killed + in care    |
| Rautio et al. 2010    | Fe | ICP-OES | Spines | 63      | 2004-2005 | FI    | 4.69–79.14     | na        | 22.94   | 100 | Dead, road-killed + starvation |
| D'Havé et al. 2006b   | Fe | ICP-MS  | Spines | 43      | 2002-2003 | BE+NL | 35-2681        | na        | 318     | 100 | Dead, road-killed + in care    |
| Vermeulen et al. 2009 | Fe | ICP-MS  | Spines | 26      | 2005-2006 | BE    | 11-90          | na        | na      | 100 | Live, wild hedgehogs           |
| D'Havé et al. 2005a   | Fe | ICP-OES | Spines | 82      | 2002      | BE    | 34.37-160.31*  | na        | na      | na  | Live, wild hedgehogs           |
| <b>Hg</b>             |    |         |        |         |           |       |                |           |         |     |                                |
| Alleva et al. 2006    | Hg | AAS     | Liver  | unknown | 1994-1995 | I     | 0.19           | na        | 0.06    | na  | Dead, road-killed              |
| <b>Mg</b>             |    |         |        |         |           |       |                |           |         |     |                                |
| Rautio et al. 2010    | Mg | ICP-OES | Hair   | 65      | 2004-2005 | FI    | 46.33–460.47   | na        | 144.88  | 100 | Dead, road-killed + starvation |
| Rautio et al. 2010    | Mg | ICP-OES | Kidney | 64      | 2004-2005 | FI    | 360.58–938.21  | na        | 600.36  | 100 | Dead, road-killed + starvation |
| Rautio et al. 2010    | Mg | ICP-OES | Liver  | 58      | 2004-2005 | FI    | 519.22–1086.24 | na        | 731.04  | 100 | Dead, road-killed + starvation |
| Rautio et al. 2010    | Mg | ICP-OES | Spines | 63      | 2004-2005 | FI    | 247.83–686.15  | na        | 358.39  | 100 | Dead, road-killed + starvation |
| <b>Mn</b>             |    |         |        |         |           |       |                |           |         |     |                                |
| Vermeulen et al. 2009 | Mn | ICP-MS  | Blood  | 26      | 2005-2006 | BE    | na             | 0.08-7.45 | na      | 100 | Live, wild hedgehogs           |

|                       |           |         |               |    |           |       |                    |         |             |     |                                |
|-----------------------|-----------|---------|---------------|----|-----------|-------|--------------------|---------|-------------|-----|--------------------------------|
| Rautio et al. 2010    | <b>Mn</b> | ICP-OES | <b>Hair</b>   | 65 | 2004-2005 | FI    | <b>ND-31.11</b>    | na      | <b>2.21</b> | 80  | Dead, road-killed + starvation |
| Vermeulen et al. 2009 | <b>Mn</b> | ICP-MS  | <b>Hair</b>   | 26 | 2005-2006 | BE    | <b>ND-7.5</b>      | na      | <b>na</b>   | 100 | Live, wild hedgehogs           |
| D'Havé et al. 2005a   | <b>Mn</b> | ICP-OES | <b>Hair</b>   | 83 | 2002      | BE    | <b>1.18-5.15*</b>  | na      | <b>na</b>   | na  | Live, wild hedgehogs           |
| Rautio et al. 2010    | <b>Mn</b> | ICP-OES | <b>Kidney</b> | 64 | 2004-2005 | FI    | <b>0.90-5.44</b>   | na      | <b>2.38</b> | 100 | Dead, road-killed + starvation |
| Rautio et al. 2010    | <b>Mn</b> | ICP-OES | <b>Liver</b>  | 58 | 2004-2005 | FI    | <b>1.69-19.18</b>  | na      | <b>6.33</b> | 100 | Dead, road-killed + starvation |
| Rautio et al. 2010    | <b>Mn</b> | ICP-OES | <b>Spines</b> | 63 | 2004-2005 | FI    | <b>ND-9.48</b>     | na      | <b>1.85</b> | 79  | Dead, road-killed + starvation |
| Vermeulen et al. 2009 | <b>Mn</b> | ICP-MS  | <b>Spines</b> | 26 | 2005-2006 | BE    | <b>ND-8.6</b>      | na      | <b>na</b>   | 100 | Live, wild hedgehogs           |
| D'Havé et al. 2005a   | <b>Mn</b> | ICP-OES | <b>Spines</b> | 82 | 2002      | BE    | <b>1.67-13.61*</b> | na      | <b>na</b>   | na  | Live, wild hedgehogs           |
| <b>Mo</b>             |           |         |               |    |           |       |                    |         |             |     |                                |
| Rautio et al. 2010    | <b>Mo</b> | ICP-OES | <b>Hair</b>   | 65 | 2004-2005 | FI    | <b>ND</b>          | na      | <b>ND</b>   | 0   | Dead, road-killed + starvation |
| Rautio et al. 2010    | <b>Mo</b> | ICP-OES | <b>Kidney</b> | 64 | 2004-2005 | FI    | <b>0.29-1.96</b>   | na      | <b>0.78</b> | 100 | Dead, road-killed + starvation |
| Rautio et al. 2010    | <b>Mo</b> | ICP-OES | <b>Liver</b>  | 58 | 2004-2005 | FI    | <b>1.47-5.12</b>   | na      | <b>2.55</b> | 100 | Dead, road-killed + starvation |
| Rautio et al. 2010    | <b>Mo</b> | ICP-OES | <b>Spines</b> | 63 | 2004-2005 | FI    | <b>ND</b>          | na      | <b>ND</b>   | 0   | Dead, road-killed + starvation |
| <b>Ni</b>             |           |         |               |    |           |       |                    |         |             |     |                                |
| Vermeulen et al. 2009 | <b>Ni</b> | ICP-MS  | <b>Blood</b>  | 26 | 2005-2006 | BE    | <b>na</b>          | ND-0.34 | <b>na</b>   | 31  | Live, wild hedgehogs           |
| D'Havé et al. 2006b   | <b>Ni</b> | ICP-MS  | <b>Fat</b>    | 7  | 2002-2003 | BE+NL | <b>0.02-0.3</b>    | na      | <b>0.11</b> | na  | Dead, road-killed + in care    |
| Rautio et al. 2010    | <b>Ni</b> | ICP-OES | <b>Hair</b>   | 65 | 2004-2005 | FI    | <b>ND-8.82</b>     | na      | <b>0,49</b> | 91  | Dead, road-killed + starvation |
| D'Havé et al. 2006b   | <b>Ni</b> | ICP-MS  | <b>Hair</b>   | 43 | 2002-2003 | BE+NL | <b>ND-7.63</b>     | na      | <b>0.73</b> | 95  | Dead, road-killed + in care    |
| Vermeulen et al. 2009 | <b>Ni</b> | ICP-MS  | <b>Hair</b>   | 26 | 2005-2006 | BE    | <b>ND-35</b>       | na      | <b>na</b>   | 31  | Live, wild hedgehogs           |
| D'Havé et al. 2005a   | <b>Ni</b> | ICP-OES | <b>Hair</b>   | 83 | 2002      | BE    | <b>0.19-0.57*</b>  | na      | <b>na</b>   | na  | Live, wild hedgehogs           |
| Rautio et al. 2010    | <b>Ni</b> | ICP-OES | <b>Kidney</b> | 64 | 2004-2005 | FI    | <b>ND-2.11</b>     | na      | <b>0.17</b> | 75  | Dead, road-killed + starvation |

|                           |    |         |        |         |           |       |            |         |      |     |                                |
|---------------------------|----|---------|--------|---------|-----------|-------|------------|---------|------|-----|--------------------------------|
| D'Havé et al. 2006b       | Ni | ICP-MS  | Kidney | 44      | 2002-2003 | BE+NL | 0.03-2.38  | na      | 0.3  | na  | Dead, road-killed + in care    |
| Rautio et al. 2010        | Ni | ICP-OES | Liver  | 58      | 2004-2005 | FI    | ND-0.83    | na      | 0.07 | 45  | Dead, road-killed + starvation |
| D'Havé et al. 2006b       | Ni | ICP-MS  | Liver  | 43      | 2002-2003 | BE+NL | 0.01-0.77  | na      | 0.2  | na  | Dead, road-killed + in care    |
| D'Havé et al. 2006b       | Ni | ICP-MS  | Muscle | 44      | 2002-2003 | BE+NL | ND-1.26    | na      | 0.28 | na  | Dead, road-killed + in care    |
| Rautio et al. 2010        | Ni | ICP-OES | Spines | 63      | 2004-2005 | FI    | ND-0.69    | na      | 0.14 | 97  | Dead, road-killed + starvation |
| D'Havé et al. 2006b       | Ni | ICP-MS  | Spines | 43      | 2002-2003 | BE+NL | ND-3.34    | na      | 0.61 | 98  | Dead, road-killed + in care    |
| Vermeulen et al. 2009     | Ni | ICP-MS  | Spines | 26      | 2005-2006 | BE    | ND-0.19    | na      | na   | 31  | Live, wild hedgehogs           |
| D'Havé et al. 2005a       | Ni | ICP-OES | Spines | 82      | 2002      | BE    | 0.16-0.8*  | na      | na   | na  | Live, wild hedgehogs           |
| Pb                        |    |         |        |         |           |       |            |         |      |     |                                |
| Vermeulen et al. 2009     | Pb | ICP-MS  | Blood  | 26      | 2005-2006 | BE    | na         | 4.9-937 | na   | 100 | Live, wild hedgehogs           |
| Rautio et al. 2010        | Pb | ICP-OES | Hair   | 65      | 2004-2005 | FI    | ND-7.1     | na      | 0.98 | 78  | Dead, road-killed + starvation |
| D'Havé et al. 2006b       | Pb | ICP-MS  | Hair   | 43      | 2002-2003 | BE+NL | 0.2-15.4   | na      | 2.6  | 100 | Dead, road-killed + in care    |
| Vermeulen et al. 2009     | Pb | ICP-MS  | Hair   | 26      | 2005-2006 | BE    | 0.1-14.1   | na      | na   | 100 | Live, wild hedgehogs           |
| D'Havé et al. 2005a       | Pb | ICP-OES | Hair   | 83      | 2002      | BE    | 0.28-11.7* | na      | na   | na  | Live, wild hedgehogs           |
| Rautio et al. 2010        | Pb | ICP-OES | Kidney | 64      | 2004-2005 | FI    | ND-4.5     | na      | 0.95 | 97  | Dead, road-killed + starvation |
| D'Havé et al. 2006b       | Pb | ICP-MS  | Kidney | 44      | 2002-2003 | BE+NL | 0.2-18.3   | na      | 5.2  | 100 | Dead, road-killed + in care    |
| Rautio et al. 2010        | Pb | ICP-OES | Liver  | 58      | 2004-2005 | FI    | ND-3.90    | na      | 1.03 | 97  | Dead, road-killed + starvation |
| D'Havé et al. 2006b       | Pb | ICP-MS  | Liver  | 43      | 2002-2003 | BE+NL | 0.7-71     | na      | 10.9 | 100 | Dead, road-killed + in care    |
| Jota Baptista et al. 2023 | Pb | ICP-MS  | Liver  | 41      | 2019-2021 | PT    | 0.09-4.46  | na      | 0.54 | na  | Dead, in care                  |
| Alleva et al. 2006        | Pb | AAS     | Liver  | unknown | 1994-1995 | I     | 0.62-1.28  | na      | 0.79 | na  | Dead, road-killed              |
| D'Havé et al. 2006b       | Pb | ICP-MS  | Muscle | 44      | 2002-2003 | BE+NL | 0.1-31.5   | na      | 1,8  | 100 | Dead, road-killed + in care    |

|                       |           |         |               |    |           |       |                      |        |               |     |                                |
|-----------------------|-----------|---------|---------------|----|-----------|-------|----------------------|--------|---------------|-----|--------------------------------|
| Rautio et al. 2010    | <b>Pb</b> | ICP-OES | <b>Spines</b> | 63 | 2004-2005 | FI    | <b>ND-7.02</b>       | na     | <b>0.54</b>   | 98  | Dead, road-killed + starvation |
| D'Havé et al. 2006b   | <b>Pb</b> | ICP-MS  | <b>Spines</b> | 43 | 2002-2003 | BE+NL | <b>0.5-13.7</b>      | na     | <b>3.8</b>    | 100 | Dead, road-killed + in care    |
| Vermeulen et al. 2009 | <b>Pb</b> | ICP-MS  | <b>Spines</b> | 26 | 2005-2006 | BE    | <b>0.2-17.2</b>      | na     | <b>na</b>     | 100 | Live, wild hedgehogs           |
| D'Havé et al. 2005a   | <b>Pb</b> | ICP-OES | <b>Spines</b> | 82 | 2002      | BE    | <b>0.58-11.79*</b>   | na     | <b>na</b>     | na  | Live, wild hedgehogs           |
| <b>Zn</b>             |           |         |               |    |           |       |                      |        |               |     |                                |
| Vermeulen et al. 2009 | <b>Zn</b> | ICP-MS  | <b>Blood</b>  | 26 | 2005-2006 | BE    | <b>na</b>            | 29-209 | <b>na</b>     | 100 | Live, wild hedgehogs           |
| D'Havé et al. 2006b   | <b>Zn</b> | ICP-MS  | <b>Fat</b>    | 7  | 2002-2003 | BE+NL | <b>0.1-1.4</b>       | na     | <b>0.6</b>    | 100 | Dead, road-killed + in care    |
| D'Havé et al. 2006b   | <b>Zn</b> | ICP-MS  | <b>Fat</b>    | 7  | 2002-2003 | BE+NL | <b>3-43</b>          | na     | <b>21</b>     | 100 | Dead, road-killed + in care    |
| Rautio et al. 2010    | <b>Zn</b> | ICP-OES | <b>Hair</b>   | 65 | 2004-2005 | FI    | <b>134.28–217.50</b> | na     | <b>167.85</b> | 100 | Dead, road-killed + starvation |
| D'Havé et al. 2006b   | <b>Zn</b> | ICP-MS  | <b>Hair</b>   | 43 | 2002-2003 | BE+NL | <b>49-426</b>        | na     | <b>201</b>    | 100 | Dead, road-killed + in care    |
| Vermeulen et al. 2009 | <b>Zn</b> | ICP-MS  | <b>Hair</b>   | 26 | 2005-2006 | BE    | <b>100-267</b>       | na     | <b>na</b>     | 100 | Live, wild hedgehogs           |
| D'Havé et al. 2005a   | <b>Zn</b> | ICP-OES | <b>Hair</b>   | 83 | 2002      | BE    | <b>99.23-147.57*</b> | na     | <b>na</b>     | na  | Live, wild hedgehogs           |
| Rautio et al. 2010    | <b>Zn</b> | ICP-OES | <b>Kidney</b> | 64 | 2004-2005 | FI    | <b>52.15–161.57</b>  | na     | <b>103.22</b> | 100 | Dead, road-killed + starvation |
| D'Havé et al. 2006b   | <b>Zn</b> | ICP-MS  | <b>Kidney</b> | 44 | 2002-2003 | BE+NL | <b>27-441</b>        | na     | <b>135</b>    | 100 | Dead, road-killed + in care    |
| Rautio et al. 2010    | <b>Zn</b> | ICP-OES | <b>Liver</b>  | 58 | 2004-2005 | FI    | <b>79.96–586.88</b>  | na     | <b>228.97</b> | 100 | Dead, road-killed + starvation |
| D'Havé et al. 2006b   | <b>Zn</b> | ICP-MS  | <b>Liver</b>  | 43 | 2002-2003 | BE+NL | <b>50-747</b>        | na     | <b>371</b>    | 100 | Dead, road-killed + in care    |
| D'Havé et al. 2006b   | <b>Zn</b> | ICP-MS  | <b>Muscle</b> | 44 | 2002-2003 | BE+NL | <b>48-299</b>        | na     | <b>177</b>    | 100 | Dead, road-killed + in care    |
| Rautio et al. 2010    | <b>Zn</b> | ICP-OES | <b>Spines</b> | 63 | 2004-2005 | FI    | <b>80.59–108.90</b>  | na     | <b>90.93</b>  | 100 | Dead, road-killed + starvation |
| D'Havé et al. 2006b   | <b>Zn</b> | ICP-MS  | <b>Spines</b> | 43 | 2002-2003 | BE+NL | <b>36-353</b>        | na     | <b>153</b>    | 100 | Dead, road-killed + in care    |
| Vermeulen et al. 2009 | <b>Zn</b> | ICP-MS  | <b>Spines</b> | 26 | 2005-2006 | BE    | <b>56-135</b>        | na     | <b>na</b>     | 100 | Live, wild hedgehogs           |
| D'Havé et al. 2005a   | <b>Zn</b> | ICP-OES | <b>Spines</b> | 82 | 2002      | BE    | <b>62.98-94.18*</b>  | na     | <b>na</b>     | na  | Live, wild hedgehogs           |
